# Supplementary material for: A hybrid approach to enhance streamflow simulation in data-constrained Himalayan basins: combining the Glacio-hydrological Degree-day Model and recurrent neural networks
Source: Copernicus journal article supplement (doi:10.5194/piahs-387-17-2024), 2024-11-18
Supplement: Supplementary file 1 [file piahs-387-17-2024-supplement.pdf]

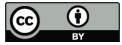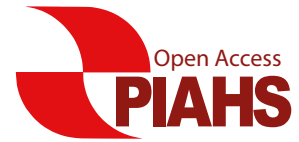

*Supplement of*

**A hybrid approach to enhance streamflow simulation in data-constrained Himalayan basins: combining the Glacio-hydrological Degree-day Model and recurrent neural networks**

**Dinesh Joshi et al.**

*Correspondence to:* Dinesh Joshi ([joshidinesh0227@gmail.com](mailto:joshidinesh0227@gmail.com))

The copyright of individual parts of the supplement might differ from the article licence.

## Contents

|                                           |   |
|-------------------------------------------|---|
| <b>Parameters Used in the Study</b> ..... | 1 |
| <b>S1 Parameters for GDM model</b> .....  | 1 |
| <b>S2 Parameters for RNNs</b> .....       | 2 |
| <b>S3 Parameters for GDM-RNNs</b> .....   | 4 |

## Parameters Used in the Study

### S1 Parameters for GDM model

Table S1 Parameters for Glacio-hydrological Degree-day Model.

| Parameters             |                         | Data Used for Calibration               |                                           |
|------------------------|-------------------------|-----------------------------------------|-------------------------------------------|
|                        |                         | One year                                | Three year                                |
| Critical temperature   |                         | 2 °C                                    | 2 °C                                      |
| Temperature lapse rate |                         | 0.6 °C 100 m <sup>-1</sup>              | 0.6 °C 100 m <sup>-1</sup>                |
| Precipitation gradient |                         | +20% ( < 2680 m )                       | +20% ( < 2680 m )                         |
|                        |                         | +30 % ( > 2680 m )                      | +30 % ( > 2680 m )                        |
| Recession coefficient  |                         | 0.90 and 0.008                          | 0.90 and 0.008                            |
| Runoff coefficient     | Land use type 1         | 0.5                                     | 0.5                                       |
|                        | Land use type 2         | 0.3                                     | 0.3                                       |
|                        | Land use type 3         | 0.3                                     | 0.3                                       |
|                        | Land use type 4         | 0.95                                    | 0.95                                      |
| Degree day factor      | Snow melt (above 500 m) |                                         |                                           |
|                        | monsoon                 | 8 mm °C <sup>-1</sup> day <sup>-1</sup> | 8.5 mm °C <sup>-1</sup> day <sup>-1</sup> |
|                        | other months            | 8 mm °C <sup>-1</sup> day <sup>-1</sup> | 7 mm °C <sup>-1</sup> day <sup>-1</sup>   |
|                        | Snow melt (below 500 m) |                                         |                                           |
|                        | monsoon                 | 8 mm °C <sup>-1</sup> day <sup>-1</sup> | 8.5 mm °C <sup>-1</sup> day <sup>-1</sup> |
|                        | other months            | 8 mm °C <sup>-1</sup> day <sup>-1</sup> | 7 mm °C <sup>-1</sup> day <sup>-1</sup>   |

|                        |  |                                           |                                            |
|------------------------|--|-------------------------------------------|--------------------------------------------|
| Ice melt (above 500 m) |  |                                           |                                            |
| monsoon                |  | 7.5 mm °C <sup>-1</sup> day <sup>-1</sup> | 10.5 mm °C <sup>-1</sup> day <sup>-1</sup> |
| other months           |  | 7.5 mm °C <sup>-1</sup> day <sup>-1</sup> | 6 mm °C <sup>-1</sup> day <sup>-1</sup>    |
| Ice melt (below 500 m) |  |                                           |                                            |
| monsoon                |  | 7.5 mm °C <sup>-1</sup> day <sup>-1</sup> | 10.5 mm °C <sup>-1</sup> day <sup>-1</sup> |
| Other months           |  | 7.5 mm °C <sup>-1</sup> day <sup>-1</sup> | 6 mm °C <sup>-1</sup> day <sup>-1</sup>    |
| Ice under debris       |  | 3 mm °C <sup>-1</sup> day <sup>-1</sup>   | 3 mm °C <sup>-1</sup> day <sup>-1</sup>    |
| Rain coefficient       |  |                                           |                                            |
| monsoon                |  | 0.085                                     | 0.1                                        |
| Other months           |  | 0.07                                      | 0.05                                       |
| Snow coefficient       |  |                                           |                                            |
| monsoon                |  | 0.25                                      | 0.3                                        |
| Other months           |  | 0.2                                       | 0.15                                       |
| $\delta_{gw,sh}$       |  | 15 days                                   | 15 days                                    |
| $\alpha_{gw,sh}$       |  | 0.9                                       | 0.9                                        |
| $\delta_{gw,dp}$       |  | 250 days                                  | 270 days                                   |
| $\alpha_{gw,dp}$       |  | 1                                         | 1                                          |
| $\beta_{dp}$           |  | 0.35                                      | 0.35                                       |
| Initial recharge       |  | 8 mm                                      | 8 mm                                       |

## S2 Parameters for RNNs

Table S2 Parameters for different RNNs model used in RNNs only approach.

| Parameters            | Simple RNN             |            | LSTM                   |            | GRU                    |            |
|-----------------------|------------------------|------------|------------------------|------------|------------------------|------------|
|                       | Data Used for Training |            | Data Used for Training |            | Data Used for Training |            |
|                       | One year               | Three year | One year               | Three year | One year               | Three year |
| Number of input units | 4                      | 4          | 4                      | 4          | 4                      | 4          |

|                                          |                          |                          |                          |                          |                          |                          |
|------------------------------------------|--------------------------|--------------------------|--------------------------|--------------------------|--------------------------|--------------------------|
| Number of hidden layers                  | 1                        | 1                        | 1                        | 1                        | 1                        | 1                        |
| Number of neurons in each hidden layer   | 32                       | 32                       | 128                      | 128                      | 128                      | 128                      |
| Activation functions in the hidden layer | tanh                     | tanh                     | tanh                     | tanh                     | tanh                     | tanh                     |
| Activation functions in the output layer | linear                   | linear                   | linear                   | linear                   | linear                   | linear                   |
| kernel initialize                        | Glorotuniform            | Glorot uniform           |
| Dropout rate                             | -                        | -                        | -                        | -                        |                          |                          |
| Batch size                               | Whole training data size | Whole training data size | Whole training data size | Whole training data size | Whole training data size | Whole training data size |
| Optimization algorithm                   | Adam                     | Adam                     | Adam                     | Adam                     | Adam                     | Adam                     |
| Sequence length                          | 365                      | 365                      | 365                      | 365                      | 365                      | 365                      |
| Input data pre-processing                | Normalization            | Normalization            | Normalization            | Normalization            | Normalization            | Normalization            |

|                                               |                          |                          |                     |                     |                          |                          |
|-----------------------------------------------|--------------------------|--------------------------|---------------------|---------------------|--------------------------|--------------------------|
| loss function                                 | Mean absolute error      | Mean absolute error      | Mean absolute error | Mean absolute error | Mean absolute error      | Mean absolute Error      |
| Number of output units                        | 1                        | 1                        | 1                   | 1                   | 1                        | 1                        |
| Number of iterations performed for training   | 172                      | 437                      | 112                 | 222                 | 82                       | 71                       |
| learning rate                                 | 0.01                     | 0.01                     | 0.01                | 0.01                | 0.01                     | 0.01                     |
| learning rate schedule                        | Exponential decay        | Exponential decay        | -                   | -                   | Exponential decay        | Exponential decay        |
| The decay rate for the learning rate schedule | Inverse time-based decay | Inverse time-based decay | -                   | -                   | Inverse time-based decay | Inverse time-based decay |

### S3 Parameters for GDM-RNNs

Table S3 Parameters for different RNNs used in GDM-RNNs hybrid approach

| Parameters            | Simple RNN             |            | LSTM                   |            | GRU                    |            |
|-----------------------|------------------------|------------|------------------------|------------|------------------------|------------|
|                       | Data Used for Training |            | Data Used for Training |            | Data Used for Training |            |
|                       | One year               | Three year | One year               | Three year | One year               | Three year |
| Number of input units | 4                      | 4          | 4                      | 4          | 4                      | 4          |

|                                          |                          |                          |                          |                          |                          |                          |
|------------------------------------------|--------------------------|--------------------------|--------------------------|--------------------------|--------------------------|--------------------------|
| Number of hidden layers                  | 1                        | 1                        | 1                        | 1                        | 1                        | 1                        |
| Number of neurons in each hidden layer   | 64                       | 128                      | 128                      | 128                      | 128                      | 254                      |
| Activation functions in the hidden layer | tanh                     | tanh                     | tanh                     | tanh                     | tanh                     | tanh                     |
| Activation functions in the output layer | linear                   | linear                   | linear                   | linear                   | linear                   | linear                   |
| kernel initialize                        | Glorot uniform           |
| Dropout rate                             | 0.4                      | 0.2                      | 0.6                      | 0.4                      | 0.5                      | 0.4                      |
| Batch size                               | Whole training data size | Whole training data size | Whole training data size | Whole training data size | Whole training data size | Whole training data size |
| Optimization algorithm                   | Adam                     | Adam                     | Adam                     | Adam                     | Adam                     | Adam                     |
| Sequence length                          | 365                      | 365                      | 365                      | 365                      | 365                      | 365                      |
| Input data pre-processing                | Normalization            | Normalization            | Normalization            | Normalization            | Normalization            | Normalization            |

| loss function                                 | Mean absolute error | Mean absolute error | Mean absolute error      | Mean absolute error | Mean absolute error | Mean absolute error |
|-----------------------------------------------|---------------------|---------------------|--------------------------|---------------------|---------------------|---------------------|
| Number of output units                        | 1                   | 1                   | 1                        | 1                   | 1                   | 1                   |
| Number of iterations performed for training   | 421                 | 61                  | 157                      | 479                 | 157                 | 269                 |
| learning rate                                 | 0.01                | 0.01                | 0.01                     | 0.01                | 0.01                | 0.01                |
| learning rate schedule                        | -                   | -                   | Exponential decay        | -                   | -                   | -                   |
| The decay rate for the learning rate schedule | -                   | -                   | Inverse time-based decay | -                   | -                   | -                   |
